# Supplementary material
Source: MDPI journal article supplement (https://www.mdpi.com/2624-5175/4/3/27)
Supplement: s1 [file s1]

## Supplementary Materials

**Table S1.** Adipokines, their molecular targets, and physiologic functions in metabolic diseases. (+): Positive correlation. (-): Negative correlation. (?): Unclear correlation. Common names and gene symbols for adipokines are provided. Diseases are listed in categories that may contain a number of related medical conditions. List of abbreviations: CVD: cardiovascular diseases. DM1: diabetes mellitus type 1. DM2: diabetes mellitus type 2. IBD: inflammatory bowel disease. HLD: hyperlipidemia. HTN: hypertension. NAFLD: non-alcoholic fatty liver disease. OSAS: obstructive sleep apnea syndrome. PCOS: polycystic ovarian syndrome. RA: rheumatoid arthritis. References for each adipokine and its biological functions are provided in the table.

| Adipokines                | Physiologic Perturbations                                                                                              | Sleep Disturbances                                                                   | Molecular Targets                                                                                                       | Physiologic Functions                                                                                                                                                                                                 | Disease Processes                                                                                                             |
|---------------------------|------------------------------------------------------------------------------------------------------------------------|--------------------------------------------------------------------------------------|-------------------------------------------------------------------------------------------------------------------------|-----------------------------------------------------------------------------------------------------------------------------------------------------------------------------------------------------------------------|-------------------------------------------------------------------------------------------------------------------------------|
| LEP/Leptin [9,17,38]      | Diurnal rhythm                                                                                                         | OSAS (+),<br>Sleep quality                                                           | Receptors: ObRs;<br>JAK-STAT3,<br>melanocortin, AgRP,<br>NPY, POMC, CART;<br>TSH, LH, GH, IGF1;<br>PI3K, Akt, AMPK      | Bone remodeling,<br>Energy expenditure,<br>Fertility,<br>Food intake,<br>Insulin signaling,<br>Neuroendocrine communication                                                                                           | Metabolic syndrome:<br>HTN, obesity, insulin resistance, HLD;<br>Osteoporosis;<br>Reproductive: amenorrhea, infertility, PCOS |
|                           | Emotional stress (+),<br>Obesity/BMI (+),<br>Satiety (+),<br>Fasting (-)<br>Physical exercises (-)<br>Weight loss (-), | (+),<br>Excessive daytime sleepiness (-),<br>REM sleep (-),<br>Sleep deprivation (?) |                                                                                                                         |                                                                                                                                                                                                                       |                                                                                                                               |
| ADIPOQ/Adiponectin [9,16] | Age (+),<br>Mediterranean diet (+),<br>Physical exercises (+),<br>Weight loss (+),<br>Obesity/BMI (-)                  | OSAS (-),<br>Sleep deprivation (?),<br>Sleep fragmentation (-)                       | Receptors: AdipoR1, AdipoR2, T-cadherin; APPL1, IRS, PI3K, Akt, PEPCK, G6P; AMPK, PPAR- $\alpha$ ; CRH; TNF- $\alpha$   | Antiapoptotic, Anti-inflammatory, Endothelial dysfunction, Anti-atherosclerotic, Cardioprotection, Energy expenditure, Fatty acid oxidation, Insulin signaling, Gluconeogenesis, Insulin-stimulated glucose transport | Atherosclerosis, CVD; Metabolic syndrome: HTN, obesity, insulin resistance, HLD; NAFLD                                        |
|                           |                                                                                                                        |                                                                                      |                                                                                                                         |                                                                                                                                                                                                                       |                                                                                                                               |
| RARRES2/Chemerin [9,21]   | Obesity/BMI (+),<br>Physical exercise (-)<br>Weight loss (-),                                                          | OSAS (+)                                                                             | Receptors: CMKLR1, GPR1, Ccr12; MAPK, ERK1/2, PI3K, Akt; GPR1; PGC1 $\alpha$ , G6P, PEPCK; TNF- $\alpha$ , IL-1 $\beta$ | Adipogenesis, Angiogenesis, Chemotaxis, Gluconeogenesis, Insulin secretion, Insulin signaling, Insulin-stimulated glucose transport, Tissue inflammation                                                              | Autoimmune: IBD, RA; Atherosclerosis, CVD; Metabolic syndrome: obesity, insulin resistance, HTN, DM2, HLD; Reproductive: PCOS |
|                           |                                                                                                                        |                                                                                      |                                                                                                                         |                                                                                                                                                                                                                       |                                                                                                                               |
|                           |                                                                                                                        | OSAS (?)                                                                             | IR, Akt, KLK7;                                                                                                          |                                                                                                                                                                                                                       | Autoimmune: RA;                                                                                                               |

|                            |                                                                        |                                                                                                          |                                                                                     |                                                                                                                                                                  |                                                                                                                                         |
|----------------------------|------------------------------------------------------------------------|----------------------------------------------------------------------------------------------------------|-------------------------------------------------------------------------------------|------------------------------------------------------------------------------------------------------------------------------------------------------------------|-----------------------------------------------------------------------------------------------------------------------------------------|
| SERPINA12/Vaspin<br>[9,19] | Diurnal rhythm<br>Obesity/BMI (+),<br>Fasting (-),<br>Weight loss (-), |                                                                                                          | GRP78/VDAC<br>complex;<br>TNF- $\alpha$ , NF- $\kappa$ B ;<br><br>NPY, POMC         | Endothelial cell<br>inflammation,<br>Endothelial cell<br>proliferation,<br>Food intake,<br>Insulin signaling,<br>Vascular smooth<br>muscle cell<br>proliferation | Atherosclerosis,<br>diabetic vascular<br>diseases;<br>Metabolic syndrome:<br>obesity, insulin<br>resistance, DM2;<br>Reproductive: PCOS |
| ITLN1/Omentin<br>[9,18]    | Physical exercise<br>(+),<br>Weight loss (+),<br>Obesity/BMI (-)       | OSAS (?)                                                                                                 | Akt;<br>CRP, TNF- $\alpha$ , NF- $\kappa$ B;<br>eNOS                                | Insulin signaling,<br>Insulin-stimulated<br>glucose transport,<br>Endothelial<br>dysfunction,<br>Vasodilation                                                    | Autoimmune: Crohn's<br>(IBD), RA, DM1;<br>Metabolic syndrome:<br>HTN, insulin<br>resistance, DM2;<br>NAFLD<br>Reproductive: PCOS        |
| NAMPT/Visfatin<br>[9,20]   | Diurnal rhythm<br>Obesity/BMI (+)                                      | Narcolepsy<br>(+),<br>Sleep<br>deprivation<br>(+),<br>Sleep latency<br>(+),<br>REM sleep (-)<br>OSAS (?) | IR, ERK1/2;<br>Syntaxin 4, HNF4 $\alpha$ ,<br>HNF1 $\beta$ , NAD;<br>NF- $\kappa$ B | Endothelial<br>dysfunction,<br>Insulin secretion,<br>Insulin signaling,<br>Insulin-stimulated<br>glucose transport,<br>Vascular smooth<br>muscle<br>dysfunction  | Acute lung injury;<br>CVD, atherosclerosis;<br>Metabolic syndrome:<br>obesity;<br>NAFLD                                                 |

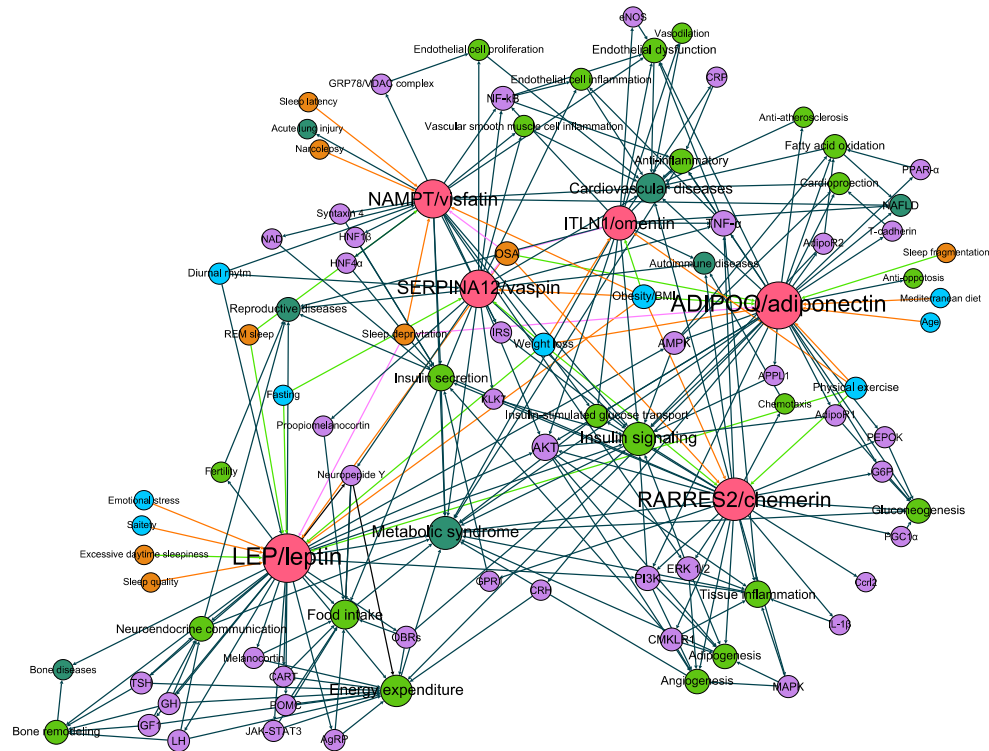

**Figure S1.** Global adipokine network: Adipokines and associated physiologic perturbations, sleep disturbances, molecular targets, physiologic functions, and relevant disease processes. The colors of the edges indicate the positive (green), negative (orange), uncertain (blue), or neutral (purple) relationships between

any two nodes. The colors of the nodes represent adipokines (pink), physiologic perturbations (blue), sleep disturbances (brown), molecular targets (light purple), physiologic functions (light green), and metabolic diseases (dark green).

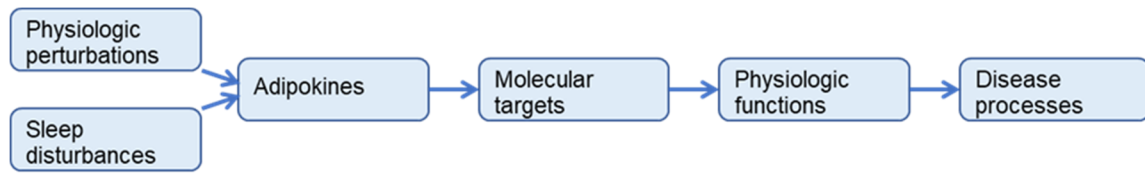

**Figure S2.** Information flow in the constructed adipokine network.
